# Supplementary material for: GSTM1 and Liver Iron Content in Children with Sickle Cell Anemia and Iron Overload
Source: MDPI journal article supplement (doi:10.3390/jcm8111878), 2019-11-05
Supplement: s1 [file s1]

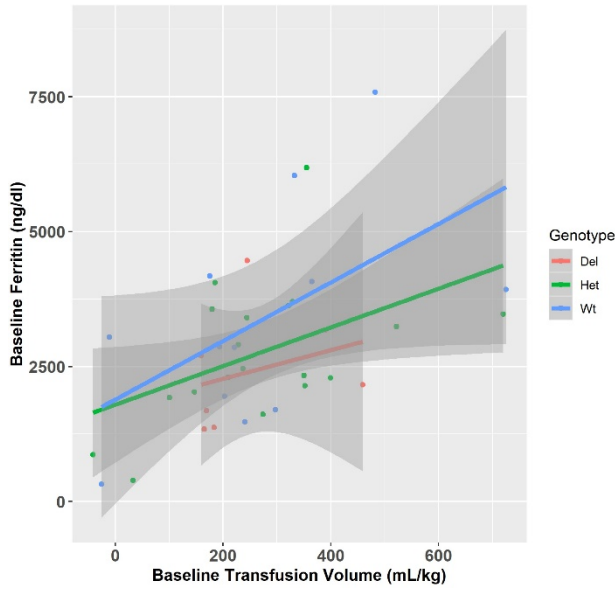

Figure S1a.

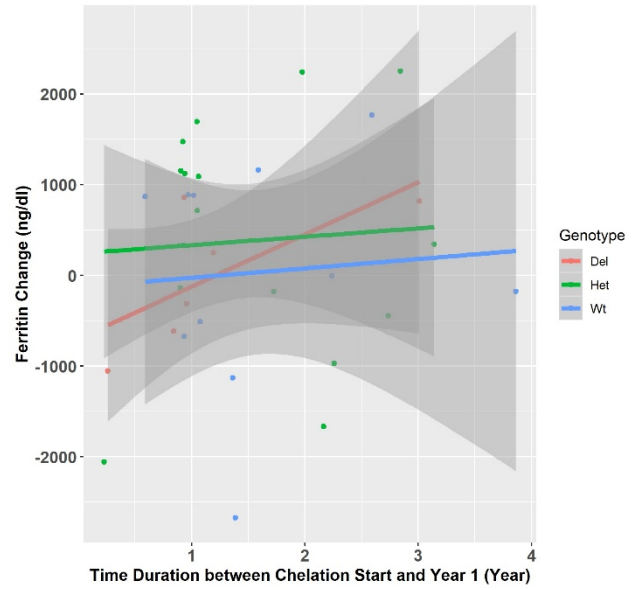

Figure S1b

**Supplemental**

**Figure 1. Serum ferritin according to *GSTM1* genotype groups.** S1a) Baseline serum ferritin is variable for similar transfusion burden and not significantly different in three genotype groups ( $p=0.29$ ) S1b) Mean change in serum ferritin was not significantly different among the three different genotypes ( $p=0.11$ ) but followed with minimal increase in WT group as compared to *GSTM1* homozygous and heterozygous deletion groups.

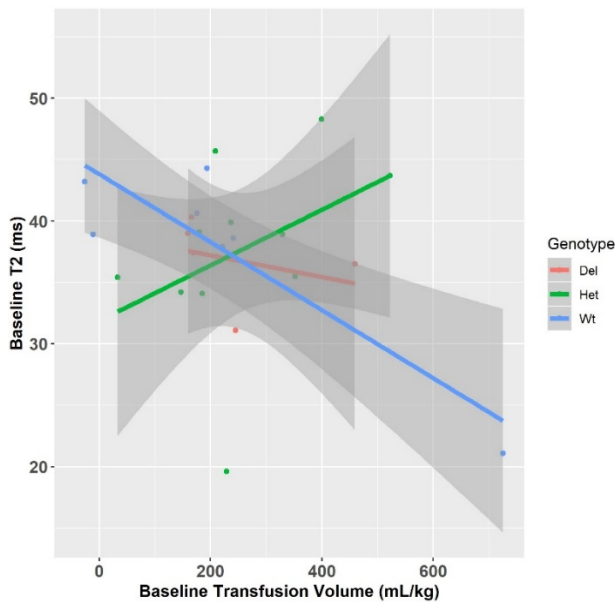

Figure S2a.

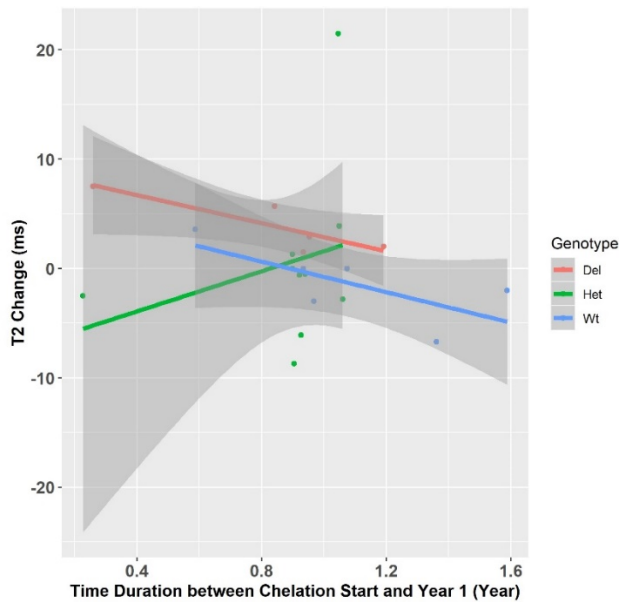

Figure S2b.

**Supplemental Figure 2. Heart T2\* according to *GSTM1* genotypes.** S2a) Baseline heart T2\* was not significantly different among the three different genotype groups. S2b) Mean change in heart T2\* was not significantly different three different genotype groups ( $p=0.11$ ).
